# Supplementary material for: Medicaid Expansion and Mortality Among Patients With Breast, Lung, and Colorectal Cancer
Source: PubMed Central journal article supplement (PMC7645694; doi:10.1001/jamanetworkopen.2020.24366), 2020-11-05
Supplement: jamanetwopen-e2024366-s001.pdf [file jamanetwopen-e2024366-s001.pdf]

## Supplemental Online Content

Lam MB, Phelan J, Orav EJ, Jha AK, Keating NL. Medicaid expansion and mortality among patients with breast, lung, and colorectal cancer. *JAMA Netw Open*. 2020;3(11):e2024366. doi:10.1001/jamanetworkopen.2020.24366

**eAppendix 1.** Definition of First Cancer Diagnosis

**eTable 1.** National Cancer Database Medicaid Expansion Status Variable

**eAppendix 2.** Definition of Race Variable

**eFigure 1.** Population Flowchart

**eTable 2.** Baseline Trend for DID Assumption

**eTable 3.** Baseline Characteristics for Pre- and Post-Expansion Groups

**eTable 4.** Cox Regression by Cancer Type

**eFigure 2.** Forest Plot of Hazard Ratios by Vulnerable Population

**eTable 5.** Cox Regression by Early and January 2014 Expansion Groups

**eTable 6.** Cox Regression of Patients with Missing/Unknown Stage

This supplemental material has been provided by the authors to give readers additional information about their work.

## eAppendix 1. Definition of First Cancer Diagnosis

National Cancer Database variable “Sequence Number” defines whether a new cancer diagnosis is their only lifetime diagnosis (00) and/or their first diagnosis (01). A prior study included 00 and 01 for their cohort and therefore we also follow a similar methodology. For the majority of patients (>95%), this was their only lifetime cancer diagnosis and for the remaining patients (<5%) this was their first cancer diagnosis. The results did not change when we excluded the <5% group.

*“The data item Sequence Number refers to the sequence of malignant and non-malignant tumors diagnosed in a patient and is used to distinguish cases with multiple cancer diagnoses. By default, your PUF includes all sequence codes available for each reported patient. Patients with only one lifetime cancer diagnosis will have a sequence number code value of 00. Sequence number 01 indicates that the reported tumor is the first of multiple diagnoses. The NCDB has no mechanism by which to link separate case reports of the same patient. It is customary to limit analyses to patients with sequence numbers 00 and 01 to ensure that any review of treatment or outcomes of the study cohort is not confounded by treatment administered for a prior cancer diagnosis...”*

### Excluding the <5%

|                                                                   | <b>Post- to Pre-Expansion<br/>Hazard Ratio (95% Confidence<br/>Interval) and p-value</b> | <b>Difference-in-Difference<br/>Ratio* and p-value</b> |
|-------------------------------------------------------------------|------------------------------------------------------------------------------------------|--------------------------------------------------------|
| <b>Main Model – Excluding &lt;5% of Patients with Sequence 01</b> |                                                                                          |                                                        |
| Non-Expansion                                                     | 0.99 (0.97-1.01)<br>p=0.22                                                               | Reference                                              |
| Combined Expansion                                                | 0.97 (0.95-0.98)<br>p<0.001                                                              | 1.03 (1.00-1.05)<br>p=0.03                             |

**eTable 1. National Cancer Database Medicaid Expansion Status Variable**

| <b>Definition</b>                        | <b>States Included</b>                                                     |
|------------------------------------------|----------------------------------------------------------------------------|
| Non-Expansion (Control) States           | TN, NC, ID, GA, FL, MO, AL, MS, KS, TX, WI, UT, SC, SD, VA, OK, NE, WY, ME |
| January 2014 Expansion States            | KY, NV, CO, OR, NM, WV, AR, RI, AZ, MD, MA, ND, OH, IA, IL, VT, HI, NY, DE |
| Early Expansion States (2010-2013)       | WA, CA, NJ, MN, DC, CT                                                     |
| Late Expansion States (after Jan. 2014)* | NH, IN, MI, PA, AK, MT, LA                                                 |

\*Late expansion states were excluded from our study to allow to enough follow up time to assess mortality

## **eAppendix 2. Definition of Race Variable**

Race categories were defined using a combination the NCDB race and Hispanic origin variables. If any Spanish/Hispanic origin is indicated, regardless of race, they are coded as “Hispanic”. If they are White (from race) and non-Hispanic/non-Spanish (from Hispanic origin) they are coded as non-Hispanic “White”. If they are Black (from race) and non-Hispanic/non-Spanish (from Hispanic origin) they are coded as Non-Hispanic “Black”. All others not falling into one of those three categories are coded as “Other”.

**eFigure 1. Population Flowchart**

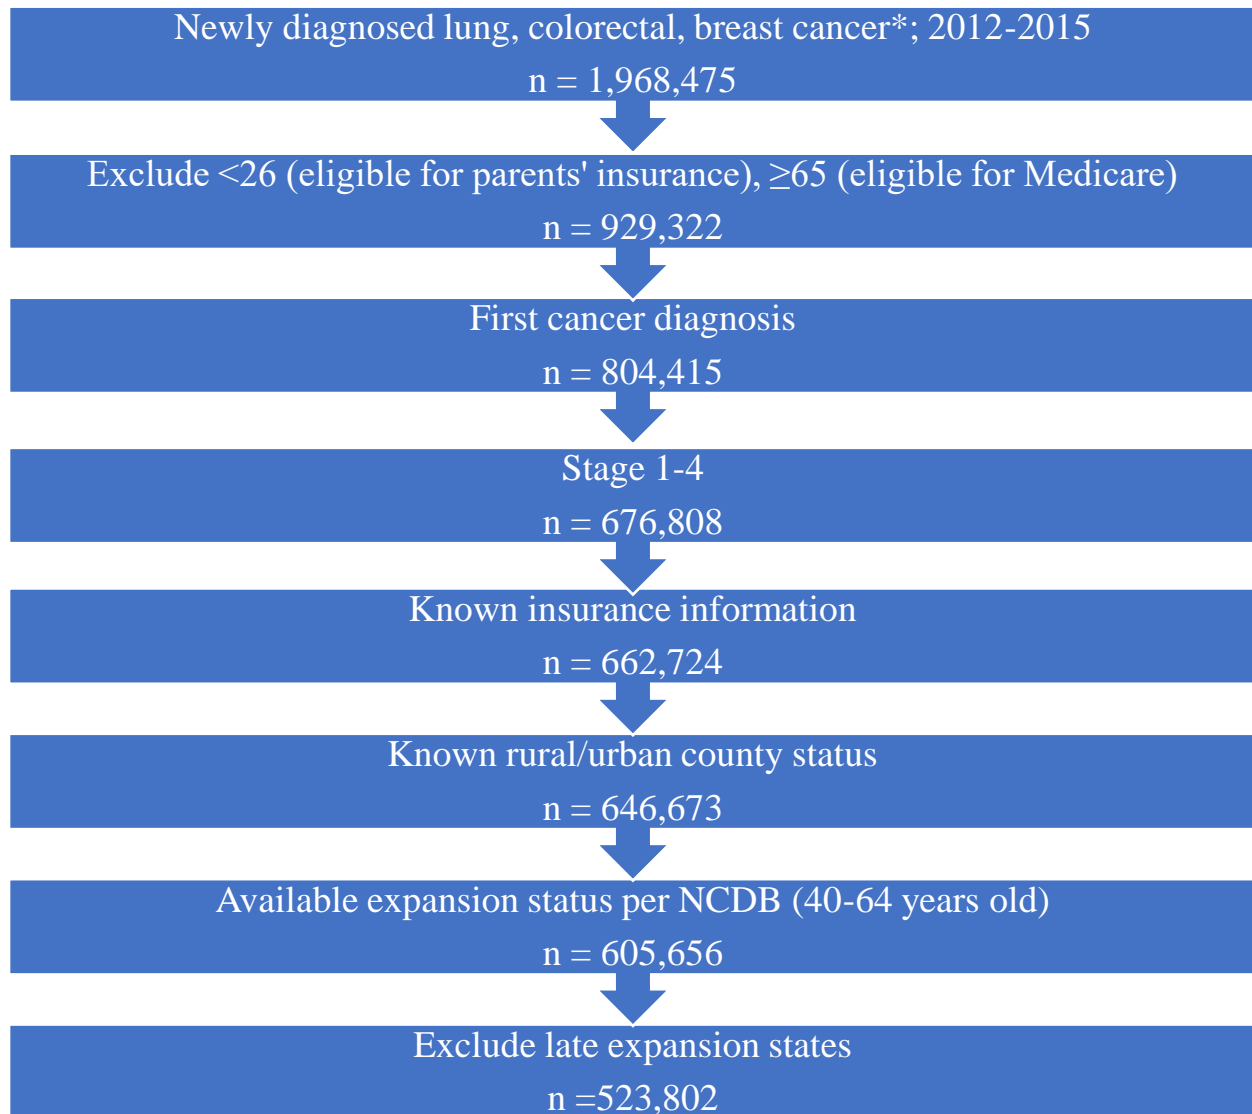

\* International Classification of Disease for Oncology, Third Edition codes were used to select patients: C500-509 (breast), C180-189, C260, C199, C209 (colorectal), C340-349 (lung).

**eTable 2. Baseline Trend for DID Assumption\***

|                    | <b>Pre-Year 2 to Pre-Year 1<br/>Hazard Ratio (95% Confidence<br/>Interval) and p-value</b> | <b>Difference-in-Difference<br/>Ratio** and p-value</b> |
|--------------------|--------------------------------------------------------------------------------------------|---------------------------------------------------------|
| Non-Expansion      | 1.002 (0.982-1.023)<br><b>p&lt;0.001</b>                                                   | Reference                                               |
| Combined Expansion | 1.024 (1.004-1.045)<br><b>p=0.018</b>                                                      | 0.979 (0.951-1.007)<br>p=0.134                          |

\*A key assumption for DID models is that baseline trends between intervention and comparison groups are similar.

\*\*Ratio of pre-year 1 to pre-year 2 HR in non-expansion states compared to pre-year 1 to pre-year 2 HR in combined expansion states. Ratios greater than 1 indicate more improvement in expansion states than in non-expansion states.

eTable 3. Baseline Characteristics for Pre- and Post-Expansion Groups

|                                   | Pre-Expansion<br>(Jan 2012-Dec 2013) |                 |                    | Post-Expansion<br>(Jan 2014-Dec 2016) |                 |                    |
|-----------------------------------|--------------------------------------|-----------------|--------------------|---------------------------------------|-----------------|--------------------|
|                                   | Non-Expansion                        | Early Expansion | Jan 2014 Expansion | Non-Expansion                         | Early Expansion | Jan 2014 Expansion |
| <b>N</b>                          | 114,692                              | 49,055          | 91,594             | 119,780                               | 51,959          | 96,722             |
| <b>Primary Cancer Site</b>        |                                      |                 |                    |                                       |                 |                    |
| Breast                            | 50.0%                                | 57.7%           | 51.8%              | 50.4%                                 | 57.2%           | 51.7%              |
| Colorectal                        | 21.4%                                | 21.2%           | 20.5%              | 22.0%                                 | 21.9%           | 20.9%              |
| Lung                              | 28.6%                                | 21.1%           | 27.7%              | 27.6%                                 | 20.9%           | 27.4%              |
| <b>Race/Ethnicity</b>             |                                      |                 |                    |                                       |                 |                    |
| White                             | 72.5%                                | 70.0%           | 77.4%              | 71.9%                                 | 68.7%           | 76.6%              |
| Black                             | 18.3%                                | 8.9%            | 11.7%              | 18.5%                                 | 8.8%            | 11.7%              |
| Hispanic                          | 5.9%                                 | 10.7%           | 4.7%               | 6.0%                                  | 11.2%           | 5.1%               |
| Other                             | 3.3%                                 | 10.5%           | 6.2%               | 3.6%                                  | 11.3%           | 6.5%               |
| <b>Female</b>                     | 72.0%                                | 77.1%           | 73.8%              | 72.3%                                 | 76.8%           | 73.7%              |
| <b>Age</b>                        |                                      |                 |                    |                                       |                 |                    |
| 40-44                             | 8.5%                                 | 9.3%            | 8.5%               | 8.3%                                  | 9.1%            | 8.2%               |
| 45-49                             | 14.3%                                | 15.6%           | 14.4%              | 13.4%                                 | 14.6%           | 13.7%              |
| 50-54                             | 21.9%                                | 22.0%           | 22.1%              | 21.2%                                 | 21.8%           | 21.3%              |
| 55-59                             | 26.1%                                | 25.3%           | 25.8%              | 27.1%                                 | 25.8%           | 26.6%              |
| 60-64                             | 29.2%                                | 27.8%           | 29.2%              | 29.9%                                 | 28.7%           | 30.2%              |
| <b>Stage at Diagnosis</b>         |                                      |                 |                    |                                       |                 |                    |
| I                                 | 34.0%                                | 38.0%           | 36.9%              | 34.9%                                 | 39.0%           | 38.1%              |
| II                                | 24.2%                                | 25.3%           | 23.3%              | 24.0%                                 | 25.1%           | 23.1%              |
| III                               | 18.6%                                | 17.1%           | 17.6%              | 18.1%                                 | 16.7%           | 17.1%              |
| IV                                | 23.3%                                | 19.5%           | 22.1%              | 23.0%                                 | 19.2%           | 21.6%              |
| <b>Insurance Type</b>             |                                      |                 |                    |                                       |                 |                    |
| Not Insured                       | 10.1%                                | 4.2%            | 5.1%               | 7.9%                                  | 2.1%            | 2.2%               |
| Private                           | 64.3%                                | 72.1%           | 69.8%              | 67.2%                                 | 72.5%           | 69.0%              |
| Medicaid                          | 11.5%                                | 13.4%           | 13.6%              | 10.2%                                 | 16.1%           | 17.2%              |
| Medicare                          | 11.4%                                | 9.3%            | 10.3%              | 11.9%                                 | 8.4%            | 10.3%              |
| Other Gov't                       | 2.7%                                 | 1.0%            | 1.2%               | 2.7%                                  | 0.9%            | 1.3%               |
| <b>Urban Location</b>             | 97.4%                                | 99.5%           | 98.4%              | 97.5%                                 | 99.5%           | 98.4%              |
| <b>Charlson Comorbidity Score</b> |                                      |                 |                    |                                       |                 |                    |
| 0                                 | 75.8%                                | 83.0%           | 77.9%              | 76.5%                                 | 81.4%           | 77.9%              |
| 1                                 | 18.4%                                | 13.3%           | 16.6%              | 17.6%                                 | 14.5%           | 16.4%              |
| 2                                 | 4.2%                                 | 2.6%            | 3.9%               | 4.2%                                  | 2.9%            | 4.0%               |

|                                                                |       |       |       |       |       |       |
|----------------------------------------------------------------|-------|-------|-------|-------|-------|-------|
| 3+                                                             | 1.6%  | 1.1%  | 1.6%  | 1.7%  | 1.3%  | 1.7%  |
| <b>Median Income by Zipcode (Quartiles)</b>                    |       |       |       |       |       |       |
| < \$38,000                                                     | 25.0% | 6.8%  | 15.9% | 24.7% | 6.8%  | 16.1% |
| \$38,000-<br>\$47,999                                          | 26.8% | 12.7% | 20.9% | 26.7% | 13.2% | 21.2% |
| \$48,000-<br>\$62,999                                          | 24.8% | 26.3% | 25.7% | 25.1% | 26.4% | 26.0% |
| >=\$63,000                                                     | 23.2% | 54.0% | 37.3% | 23.4% | 53.5% | 36.5% |
| Missing                                                        | 0.1%  | 0.1%  | 0.2%  | 0.1%  | 0.1%  | 0.2%  |
| <b>Education: Less than High School by Zipcode (Quartiles)</b> |       |       |       |       |       |       |
| >=21.0%                                                        | 23.2% | 17.6% | 15.1% | 23.0% | 17.4% | 15.6% |
| 13.0-20.9%                                                     | 29.3% | 18.3% | 25.4% | 29.2% | 18.9% | 25.7% |
| 7.0-12.9%                                                      | 28.3% | 33.2% | 33.0% | 28.3% | 33.2% | 32.8% |
| <7.0%                                                          | 19.1% | 30.8% | 26.4% | 19.4% | 30.4% | 25.7% |
| Missing                                                        | 0.1%  | 0.1%  | 0.1%  | 0.1%  | 0.1%  | 0.1%  |



**eTable 4. Cox Regression by Cancer Type**

|                    | <b>Post- to Pre-Expansion Hazard Ratio (95% Confidence Interval) and p-value</b> | <b>Difference-in-Difference Ratio* and p-value</b> |
|--------------------|----------------------------------------------------------------------------------|----------------------------------------------------|
| <b>Breast</b>      |                                                                                  |                                                    |
| Non-Expansion      | 1.117 (1.069-1.167)<br><b>p&lt;0.001</b>                                         | Reference                                          |
| Combined Expansion | 1.078 (1.034-1.125)<br><b>p&lt;0.001</b>                                         | 1.036** (0.977-1.098)<br>p=0.240                   |
| <b>Colorectal</b>  |                                                                                  |                                                    |
| Non-Expansion      | 1.096 (1.058-1.135)<br><b>p&lt;0.001</b>                                         | Reference                                          |
| Combined Expansion | 1.051 (1.016-1.087)<br><b>p=0.004</b>                                            | 1.043** (0.995-1.093)<br>p=0.083                   |
| <b>Lung</b>        |                                                                                  |                                                    |
| Non-Expansion      | 0.972 (0.953-0.990)<br><b>p=0.003</b>                                            | Reference                                          |
| Combined Expansion | 0.944 (0.927-0.962)<br><b>p&lt;0.001</b>                                         | 1.029** (1.002-1.057)<br><b>p=0.033</b>            |

\*Ratio of pre- to post- HR in non-expansion states compared to pre to post HR in combined expansion states. Ratios greater than 1 indicate more improvement in expansion states than in non-expansion states.

\*\* A three-way interaction term indicates that the mortality benefit among breast cancer patients in combined expansion states relative to non-expansion states (DID-HR 1.036) is not significantly different (p=0.911) from the benefit among colorectal cancer patients in combined expansion states relative to non-expansion states (DID-HR 1.043) or from lung cancer patients in combined expansion states relative to non-expansion states (DID-HR 1.029).

**eFigure 2. Forest Plot of Hazard Ratios by Vulnerable Population**

**Hazard Ratios Post Medicaid Expansion  
(Relative to Pre Period)**

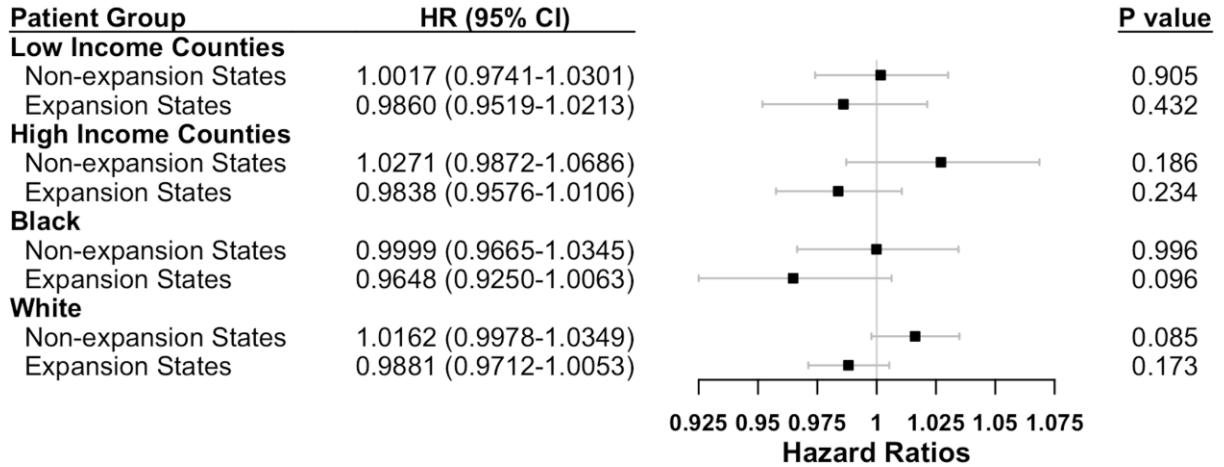

**eTable 5. Cox Regression by Early and January 2014 Expansion Groups**

|                    | <b>Post- to Pre-Expansion<br/>Hazard Ratio (95% Confidence<br/>Interval) and p-value</b> | <b>Difference-in-Difference<br/>Ratio* and p-value</b> |
|--------------------|------------------------------------------------------------------------------------------|--------------------------------------------------------|
| <b>Main Model</b>  |                                                                                          |                                                        |
| Non-Expansion      | 1.006 (0.991-1.022)<br>p=0.431                                                           | Reference                                              |
| Combined Expansion | 0.980 (0.965-0.995)<br><b>p=0.008</b>                                                    | 1.027 (1.005-1.049)<br><b>p=0.015</b>                  |
| Early Expansion    | 0.968 (0.942-0.994)<br><b>p=0.016</b>                                                    | 1.040 (1.008-1.072)<br><b>p=0.013</b>                  |
| Jan 2014 Expansion | 0.985 (0.968-1.003)<br>p=0.110                                                           | 1.021 (0.997-1.046)<br>p=0.080                         |

**eTable 6. Cox Regression of Patients with Missing/Unknown Stage**

|                                                     | <b>Post- to Pre-Expansion<br/>Hazard Ratio (95% Confidence<br/>Interval) and p-value</b> | <b>Difference-in-Difference<br/>Ratio* and p-value</b> |
|-----------------------------------------------------|------------------------------------------------------------------------------------------|--------------------------------------------------------|
| <b>Main Model – Including Missing/Unknown Stage</b> |                                                                                          |                                                        |
| Non-Expansion                                       | 1.005 (0.989-1.020)<br>p=0.541                                                           | Reference                                              |
| Combined Expansion                                  | 0.977 (0.963-0.992)<br>p=0.003                                                           | 1.028 (1.007-1.050)<br>p=0.010                         |
| <b>Main Model – Missing/Unknown Stage Only</b>      |                                                                                          |                                                        |
| Non-Expansion                                       | 0.951 (0.856-1.057)<br>p=0.355                                                           | Reference                                              |
| Combined Expansion                                  | 0.847 (0.763-0.940)<br>p=0.002                                                           | 1.123 (0.971-1.300)<br>p=0.118                         |

\*Ratio of pre- to post- HR in non-expansion states compared to pre to post HR in combined expansion states. Ratios greater than 1 indicate more improvement in expansion states than in non-expansion states.
